# Supplementary material for: Ten years of coverage of trophy hunting in UK newspapers
Source: Frontiers journal article supplement (doi:10.3389/fcosc.2022.1061295), 2022-12-05
Supplement: Data_Sheet_2.docx [file Data_Sheet_2.docx]

Supplementary Table 1. Full breakdown of number of articles judged as having each sentiment (pro-TH, anti-TH, neutral, or complicated) published in each media outlet, for all ten years between July 1 2010 and June 30 2020.

| **Year** | **Outlet** | **Type** | **Sentiment** | **Articles** |
| --- | --- | --- | --- | --- |
| 2010-11 | Daily Star Online | Tabloid | Anti | 0 |
| 2011-12 | Daily Star Online | Tabloid | Anti | 0 |
| 2012-13 | Daily Star Online | Tabloid | Anti | 0 |
| 2013-14 | Daily Star Online | Tabloid | Anti | 0 |
| 2014-15 | Daily Star Online | Tabloid | Anti | 2 |
| 2015-16 | Daily Star Online | Tabloid | Anti | 7 |
| 2016-17 | Daily Star Online | Tabloid | Anti | 4 |
| 2017-18 | Daily Star Online | Tabloid | Anti | 2 |
| 2018-19 | Daily Star Online | Tabloid | Anti | 4 |
| 2019-20 | Daily Star Online | Tabloid | Anti | 24 |
| 2010-11 | The Sunday Express | Tabloid | Anti | 2 |
| 2011-12 | The Sunday Express | Tabloid | Anti | 0 |
| 2012-13 | The Sunday Express | Tabloid | Anti | 0 |
| 2013-14 | The Sunday Express | Tabloid | Anti | 0 |
| 2014-15 | The Sunday Express | Tabloid | Anti | 0 |
| 2015-16 | The Sunday Express | Tabloid | Anti | 3 |
| 2016-17 | The Sunday Express | Tabloid | Anti | 0 |
| 2017-18 | The Sunday Express | Tabloid | Anti | 0 |
| 2018-19 | The Sunday Express | Tabloid | Anti | 1 |
| 2019-20 | The Sunday Express | Tabloid | Anti | 0 |
| 2010-11 | telegraph.co.uk | Broadsheet | Anti | 0 |
| 2011-12 | telegraph.co.uk | Broadsheet | Anti | 0 |
| 2012-13 | telegraph.co.uk | Broadsheet | Anti | 0 |
| 2013-14 | telegraph.co.uk | Broadsheet | Anti | 1 |
| 2014-15 | telegraph.co.uk | Broadsheet | Anti | 0 |
| 2015-16 | telegraph.co.uk | Broadsheet | Anti | 5 |
| 2016-17 | telegraph.co.uk | Broadsheet | Anti | 1 |
| 2017-18 | telegraph.co.uk | Broadsheet | Anti | 2 |
| 2018-19 | telegraph.co.uk | Broadsheet | Anti | 5 |
| 2019-20 | telegraph.co.uk | Broadsheet | Anti | 8 |
| 2010-11 | The Daily Mail and Mail on Sunday | Tabloid | Anti | 1 |
| 2011-12 | The Daily Mail and Mail on Sunday | Tabloid | Anti | 1 |
| 2012-13 | The Daily Mail and Mail on Sunday | Tabloid | Anti | 1 |
| 2013-14 | The Daily Mail and Mail on Sunday | Tabloid | Anti | 0 |
| 2014-15 | The Daily Mail and Mail on Sunday | Tabloid | Anti | 0 |
| 2015-16 | The Daily Mail and Mail on Sunday | Tabloid | Anti | 9 |
| 2016-17 | The Daily Mail and Mail on Sunday | Tabloid | Anti | 0 |
| 2017-18 | The Daily Mail and Mail on Sunday | Tabloid | Anti | 0 |
| 2018-19 | The Daily Mail and Mail on Sunday | Tabloid | Anti | 8 |
| 2019-20 | The Daily Mail and Mail on Sunday | Tabloid | Anti | 6 |
| 2010-11 | The Express | Tabloid | Anti | 1 |
| 2011-12 | The Express | Tabloid | Anti | 0 |
| 2012-13 | The Express | Tabloid | Anti | 1 |
| 2013-14 | The Express | Tabloid | Anti | 0 |
| 2014-15 | The Express | Tabloid | Anti | 0 |
| 2015-16 | The Express | Tabloid | Anti | 3 |
| 2016-17 | The Express | Tabloid | Anti | 1 |
| 2017-18 | The Express | Tabloid | Anti | 1 |
| 2018-19 | The Express | Tabloid | Anti | 2 |
| 2019-20 | The Express | Tabloid | Anti | 2 |
| 2010-11 | The Guardian | Broadsheet | Anti | 0 |
| 2011-12 | The Guardian | Broadsheet | Anti | 0 |
| 2012-13 | The Guardian | Broadsheet | Anti | 1 |
| 2013-14 | The Guardian | Broadsheet | Anti | 2 |
| 2014-15 | The Guardian | Broadsheet | Anti | 0 |
| 2015-16 | The Guardian | Broadsheet | Anti | 6 |
| 2016-17 | The Guardian | Broadsheet | Anti | 1 |
| 2017-18 | The Guardian | Broadsheet | Anti | 4 |
| 2018-19 | The Guardian | Broadsheet | Anti | 2 |
| 2019-20 | The Guardian | Broadsheet | Anti | 2 |
| 2010-11 | The Independent | Broadsheet | Anti | 1 |
| 2011-12 | The Independent | Broadsheet | Anti | 0 |
| 2012-13 | The Independent | Broadsheet | Anti | 3 |
| 2013-14 | The Independent | Broadsheet | Anti | 2 |
| 2014-15 | The Independent | Broadsheet | Anti | 1 |
| 2015-16 | The Independent | Broadsheet | Anti | 13 |
| 2016-17 | The Independent | Broadsheet | Anti | 1 |
| 2017-18 | The Independent | Broadsheet | Anti | 8 |
| 2018-19 | The Independent | Broadsheet | Anti | 8 |
| 2019-20 | The Independent | Broadsheet | Anti | 14 |
| 2010-11 | The Mirror | Tabloid | Anti | 2 |
| 2011-12 | The Mirror | Tabloid | Anti | 0 |
| 2012-13 | The Mirror | Tabloid | Anti | 0 |
| 2013-14 | The Mirror | Tabloid | Anti | 0 |
| 2014-15 | The Mirror | Tabloid | Anti | 2 |
| 2015-16 | The Mirror | Tabloid | Anti | 27 |
| 2016-17 | The Mirror | Tabloid | Anti | 17 |
| 2017-18 | The Mirror | Tabloid | Anti | 12 |
| 2018-19 | The Mirror | Tabloid | Anti | 19 |
| 2019-20 | The Mirror | Tabloid | Anti | 83 |
| 2010-11 | The Observer | Broadsheet | Anti | 0 |
| 2011-12 | The Observer | Broadsheet | Anti | 0 |
| 2012-13 | The Observer | Broadsheet | Anti | 0 |
| 2013-14 | The Observer | Broadsheet | Anti | 0 |
| 2014-15 | The Observer | Broadsheet | Anti | 1 |
| 2015-16 | The Observer | Broadsheet | Anti | 0 |
| 2016-17 | The Observer | Broadsheet | Anti | 0 |
| 2017-18 | The Observer | Broadsheet | Anti | 0 |
| 2018-19 | The Observer | Broadsheet | Anti | 0 |
| 2019-20 | The Observer | Broadsheet | Anti | 0 |
| 2010-11 | The Sun | Tabloid | Anti | 0 |
| 2011-12 | The Sun | Tabloid | Anti | 0 |
| 2012-13 | The Sun | Tabloid | Anti | 1 |
| 2013-14 | The Sun | Tabloid | Anti | 0 |
| 2014-15 | The Sun | Tabloid | Anti | 0 |
| 2015-16 | The Sun | Tabloid | Anti | 6 |
| 2016-17 | The Sun | Tabloid | Anti | 1 |
| 2017-18 | The Sun | Tabloid | Anti | 1 |
| 2018-19 | The Sun | Tabloid | Anti | 3 |
| 2019-20 | The Sun | Tabloid | Anti | 2 |
| 2010-11 | The Sunday Times | Broadsheet | Anti | 0 |
| 2011-12 | The Sunday Times | Broadsheet | Anti | 1 |
| 2012-13 | The Sunday Times | Broadsheet | Anti | 0 |
| 2013-14 | The Sunday Times | Broadsheet | Anti | 0 |
| 2014-15 | The Sunday Times | Broadsheet | Anti | 1 |
| 2015-16 | The Sunday Times | Broadsheet | Anti | 0 |
| 2016-17 | The Sunday Times | Broadsheet | Anti | 0 |
| 2017-18 | The Sunday Times | Broadsheet | Anti | 0 |
| 2018-19 | The Sunday Times | Broadsheet | Anti | 0 |
| 2019-20 | The Sunday Times | Broadsheet | Anti | 1 |
| 2010-11 | The Times | Broadsheet | Anti | 0 |
| 2011-12 | The Times | Broadsheet | Anti | 0 |
| 2012-13 | The Times | Broadsheet | Anti | 0 |
| 2013-14 | The Times | Broadsheet | Anti | 0 |
| 2014-15 | The Times | Broadsheet | Anti | 0 |
| 2015-16 | The Times | Broadsheet | Anti | 7 |
| 2016-17 | The Times | Broadsheet | Anti | 1 |
| 2017-18 | The Times | Broadsheet | Anti | 4 |
| 2018-19 | The Times | Broadsheet | Anti | 7 |
| 2019-20 | The Times | Broadsheet | Anti | 18 |
| 2010-11 | Daily Star Online | Tabloid | Complicated | 0 |
| 2011-12 | Daily Star Online | Tabloid | Complicated | 0 |
| 2012-13 | Daily Star Online | Tabloid | Complicated | 0 |
| 2013-14 | Daily Star Online | Tabloid | Complicated | 0 |
| 2014-15 | Daily Star Online | Tabloid | Complicated | 0 |
| 2015-16 | Daily Star Online | Tabloid | Complicated | 0 |
| 2016-17 | Daily Star Online | Tabloid | Complicated | 0 |
| 2017-18 | Daily Star Online | Tabloid | Complicated | 0 |
| 2018-19 | Daily Star Online | Tabloid | Complicated | 0 |
| 2019-20 | Daily Star Online | Tabloid | Complicated | 1 |
| 2010-11 | The Sunday Express | Tabloid | Complicated | 0 |
| 2011-12 | The Sunday Express | Tabloid | Complicated | 0 |
| 2012-13 | The Sunday Express | Tabloid | Complicated | 0 |
| 2013-14 | The Sunday Express | Tabloid | Complicated | 0 |
| 2014-15 | The Sunday Express | Tabloid | Complicated | 0 |
| 2015-16 | The Sunday Express | Tabloid | Complicated | 0 |
| 2016-17 | The Sunday Express | Tabloid | Complicated | 0 |
| 2017-18 | The Sunday Express | Tabloid | Complicated | 0 |
| 2018-19 | The Sunday Express | Tabloid | Complicated | 0 |
| 2019-20 | The Sunday Express | Tabloid | Complicated | 0 |
| 2010-11 | telegraph.co.uk | Broadsheet | Complicated | 0 |
| 2011-12 | telegraph.co.uk | Broadsheet | Complicated | 1 |
| 2012-13 | telegraph.co.uk | Broadsheet | Complicated | 0 |
| 2013-14 | telegraph.co.uk | Broadsheet | Complicated | 0 |
| 2014-15 | telegraph.co.uk | Broadsheet | Complicated | 2 |
| 2015-16 | telegraph.co.uk | Broadsheet | Complicated | 7 |
| 2016-17 | telegraph.co.uk | Broadsheet | Complicated | 0 |
| 2017-18 | telegraph.co.uk | Broadsheet | Complicated | 5 |
| 2018-19 | telegraph.co.uk | Broadsheet | Complicated | 6 |
| 2019-20 | telegraph.co.uk | Broadsheet | Complicated | 2 |
| 2010-11 | The Daily Mail and Mail on Sunday | Tabloid | Complicated | 0 |
| 2011-12 | The Daily Mail and Mail on Sunday | Tabloid | Complicated | 1 |
| 2012-13 | The Daily Mail and Mail on Sunday | Tabloid | Complicated | 0 |
| 2013-14 | The Daily Mail and Mail on Sunday | Tabloid | Complicated | 0 |
| 2014-15 | The Daily Mail and Mail on Sunday | Tabloid | Complicated | 0 |
| 2015-16 | The Daily Mail and Mail on Sunday | Tabloid | Complicated | 2 |
| 2016-17 | The Daily Mail and Mail on Sunday | Tabloid | Complicated | 0 |
| 2017-18 | The Daily Mail and Mail on Sunday | Tabloid | Complicated | 0 |
| 2018-19 | The Daily Mail and Mail on Sunday | Tabloid | Complicated | 1 |
| 2019-20 | The Daily Mail and Mail on Sunday | Tabloid | Complicated | 0 |
| 2010-11 | The Express | Tabloid | Complicated | 0 |
| 2011-12 | The Express | Tabloid | Complicated | 0 |
| 2012-13 | The Express | Tabloid | Complicated | 0 |
| 2013-14 | The Express | Tabloid | Complicated | 0 |
| 2014-15 | The Express | Tabloid | Complicated | 0 |
| 2015-16 | The Express | Tabloid | Complicated | 0 |
| 2016-17 | The Express | Tabloid | Complicated | 0 |
| 2017-18 | The Express | Tabloid | Complicated | 0 |
| 2018-19 | The Express | Tabloid | Complicated | 0 |
| 2019-20 | The Express | Tabloid | Complicated | 0 |
| 2010-11 | The Guardian | Broadsheet | Complicated | 1 |
| 2011-12 | The Guardian | Broadsheet | Complicated | 0 |
| 2012-13 | The Guardian | Broadsheet | Complicated | 1 |
| 2013-14 | The Guardian | Broadsheet | Complicated | 0 |
| 2014-15 | The Guardian | Broadsheet | Complicated | 0 |
| 2015-16 | The Guardian | Broadsheet | Complicated | 9 |
| 2016-17 | The Guardian | Broadsheet | Complicated | 3 |
| 2017-18 | The Guardian | Broadsheet | Complicated | 2 |
| 2018-19 | The Guardian | Broadsheet | Complicated | 6 |
| 2019-20 | The Guardian | Broadsheet | Complicated | 1 |
| 2010-11 | The Independent | Broadsheet | Complicated | 0 |
| 2011-12 | The Independent | Broadsheet | Complicated | 0 |
| 2012-13 | The Independent | Broadsheet | Complicated | 3 |
| 2013-14 | The Independent | Broadsheet | Complicated | 1 |
| 2014-15 | The Independent | Broadsheet | Complicated | 1 |
| 2015-16 | The Independent | Broadsheet | Complicated | 9 |
| 2016-17 | The Independent | Broadsheet | Complicated | 0 |
| 2017-18 | The Independent | Broadsheet | Complicated | 5 |
| 2018-19 | The Independent | Broadsheet | Complicated | 5 |
| 2019-20 | The Independent | Broadsheet | Complicated | 3 |
| 2010-11 | The Mirror | Tabloid | Complicated | 0 |
| 2011-12 | The Mirror | Tabloid | Complicated | 0 |
| 2012-13 | The Mirror | Tabloid | Complicated | 0 |
| 2013-14 | The Mirror | Tabloid | Complicated | 0 |
| 2014-15 | The Mirror | Tabloid | Complicated | 0 |
| 2015-16 | The Mirror | Tabloid | Complicated | 1 |
| 2016-17 | The Mirror | Tabloid | Complicated | 0 |
| 2017-18 | The Mirror | Tabloid | Complicated | 0 |
| 2018-19 | The Mirror | Tabloid | Complicated | 0 |
| 2019-20 | The Mirror | Tabloid | Complicated | 2 |
| 2010-11 | The Observer | Broadsheet | Complicated | 0 |
| 2011-12 | The Observer | Broadsheet | Complicated | 0 |
| 2012-13 | The Observer | Broadsheet | Complicated | 0 |
| 2013-14 | The Observer | Broadsheet | Complicated | 0 |
| 2014-15 | The Observer | Broadsheet | Complicated | 0 |
| 2015-16 | The Observer | Broadsheet | Complicated | 1 |
| 2016-17 | The Observer | Broadsheet | Complicated | 0 |
| 2017-18 | The Observer | Broadsheet | Complicated | 0 |
| 2018-19 | The Observer | Broadsheet | Complicated | 0 |
| 2019-20 | The Observer | Broadsheet | Complicated | 0 |
| 2010-11 | The Sun | Tabloid | Complicated | 0 |
| 2011-12 | The Sun | Tabloid | Complicated | 1 |
| 2012-13 | The Sun | Tabloid | Complicated | 0 |
| 2013-14 | The Sun | Tabloid | Complicated | 0 |
| 2014-15 | The Sun | Tabloid | Complicated | 0 |
| 2015-16 | The Sun | Tabloid | Complicated | 0 |
| 2016-17 | The Sun | Tabloid | Complicated | 0 |
| 2017-18 | The Sun | Tabloid | Complicated | 0 |
| 2018-19 | The Sun | Tabloid | Complicated | 1 |
| 2019-20 | The Sun | Tabloid | Complicated | 1 |
| 2010-11 | The Sunday Times | Broadsheet | Complicated | 1 |
| 2011-12 | The Sunday Times | Broadsheet | Complicated | 0 |
| 2012-13 | The Sunday Times | Broadsheet | Complicated | 0 |
| 2013-14 | The Sunday Times | Broadsheet | Complicated | 1 |
| 2014-15 | The Sunday Times | Broadsheet | Complicated | 0 |
| 2015-16 | The Sunday Times | Broadsheet | Complicated | 0 |
| 2016-17 | The Sunday Times | Broadsheet | Complicated | 0 |
| 2017-18 | The Sunday Times | Broadsheet | Complicated | 0 |
| 2018-19 | The Sunday Times | Broadsheet | Complicated | 1 |
| 2019-20 | The Sunday Times | Broadsheet | Complicated | 1 |
| 2010-11 | The Times | Broadsheet | Complicated | 1 |
| 2011-12 | The Times | Broadsheet | Complicated | 0 |
| 2012-13 | The Times | Broadsheet | Complicated | 0 |
| 2013-14 | The Times | Broadsheet | Complicated | 1 |
| 2014-15 | The Times | Broadsheet | Complicated | 1 |
| 2015-16 | The Times | Broadsheet | Complicated | 3 |
| 2016-17 | The Times | Broadsheet | Complicated | 2 |
| 2017-18 | The Times | Broadsheet | Complicated | 1 |
| 2018-19 | The Times | Broadsheet | Complicated | 5 |
| 2019-20 | The Times | Broadsheet | Complicated | 6 |
| 2010-11 | Daily Star Online | Tabloid | Neutral | 0 |
| 2011-12 | Daily Star Online | Tabloid | Neutral | 0 |
| 2012-13 | Daily Star Online | Tabloid | Neutral | 0 |
| 2013-14 | Daily Star Online | Tabloid | Neutral | 0 |
| 2014-15 | Daily Star Online | Tabloid | Neutral | 0 |
| 2015-16 | Daily Star Online | Tabloid | Neutral | 1 |
| 2016-17 | Daily Star Online | Tabloid | Neutral | 0 |
| 2017-18 | Daily Star Online | Tabloid | Neutral | 1 |
| 2018-19 | Daily Star Online | Tabloid | Neutral | 1 |
| 2019-20 | Daily Star Online | Tabloid | Neutral | 8 |
| 2010-11 | The Sunday Express | Tabloid | Neutral | 0 |
| 2011-12 | The Sunday Express | Tabloid | Neutral | 0 |
| 2012-13 | The Sunday Express | Tabloid | Neutral | 0 |
| 2013-14 | The Sunday Express | Tabloid | Neutral | 0 |
| 2014-15 | The Sunday Express | Tabloid | Neutral | 0 |
| 2015-16 | The Sunday Express | Tabloid | Neutral | 0 |
| 2016-17 | The Sunday Express | Tabloid | Neutral | 0 |
| 2017-18 | The Sunday Express | Tabloid | Neutral | 0 |
| 2018-19 | The Sunday Express | Tabloid | Neutral | 0 |
| 2019-20 | The Sunday Express | Tabloid | Neutral | 0 |
| 2010-11 | telegraph.co.uk | Broadsheet | Neutral | 0 |
| 2011-12 | telegraph.co.uk | Broadsheet | Neutral | 0 |
| 2012-13 | telegraph.co.uk | Broadsheet | Neutral | 0 |
| 2013-14 | telegraph.co.uk | Broadsheet | Neutral | 0 |
| 2014-15 | telegraph.co.uk | Broadsheet | Neutral | 0 |
| 2015-16 | telegraph.co.uk | Broadsheet | Neutral | 7 |
| 2016-17 | telegraph.co.uk | Broadsheet | Neutral | 0 |
| 2017-18 | telegraph.co.uk | Broadsheet | Neutral | 2 |
| 2018-19 | telegraph.co.uk | Broadsheet | Neutral | 3 |
| 2019-20 | telegraph.co.uk | Broadsheet | Neutral | 1 |
| 2010-11 | The Daily Mail and Mail on Sunday | Tabloid | Neutral | 1 |
| 2011-12 | The Daily Mail and Mail on Sunday | Tabloid | Neutral | 0 |
| 2012-13 | The Daily Mail and Mail on Sunday | Tabloid | Neutral | 0 |
| 2013-14 | The Daily Mail and Mail on Sunday | Tabloid | Neutral | 0 |
| 2014-15 | The Daily Mail and Mail on Sunday | Tabloid | Neutral | 0 |
| 2015-16 | The Daily Mail and Mail on Sunday | Tabloid | Neutral | 4 |
| 2016-17 | The Daily Mail and Mail on Sunday | Tabloid | Neutral | 0 |
| 2017-18 | The Daily Mail and Mail on Sunday | Tabloid | Neutral | 0 |
| 2018-19 | The Daily Mail and Mail on Sunday | Tabloid | Neutral | 0 |
| 2019-20 | The Daily Mail and Mail on Sunday | Tabloid | Neutral | 0 |
| 2010-11 | The Express | Tabloid | Neutral | 1 |
| 2011-12 | The Express | Tabloid | Neutral | 0 |
| 2012-13 | The Express | Tabloid | Neutral | 0 |
| 2013-14 | The Express | Tabloid | Neutral | 0 |
| 2014-15 | The Express | Tabloid | Neutral | 0 |
| 2015-16 | The Express | Tabloid | Neutral | 0 |
| 2016-17 | The Express | Tabloid | Neutral | 0 |
| 2017-18 | The Express | Tabloid | Neutral | 0 |
| 2018-19 | The Express | Tabloid | Neutral | 2 |
| 2019-20 | The Express | Tabloid | Neutral | 0 |
| 2010-11 | The Guardian | Broadsheet | Neutral | 2 |
| 2011-12 | The Guardian | Broadsheet | Neutral | 0 |
| 2012-13 | The Guardian | Broadsheet | Neutral | 1 |
| 2013-14 | The Guardian | Broadsheet | Neutral | 1 |
| 2014-15 | The Guardian | Broadsheet | Neutral | 0 |
| 2015-16 | The Guardian | Broadsheet | Neutral | 12 |
| 2016-17 | The Guardian | Broadsheet | Neutral | 1 |
| 2017-18 | The Guardian | Broadsheet | Neutral | 0 |
| 2018-19 | The Guardian | Broadsheet | Neutral | 1 |
| 2019-20 | The Guardian | Broadsheet | Neutral | 3 |
| 2010-11 | The Independent | Broadsheet | Neutral | 1 |
| 2011-12 | The Independent | Broadsheet | Neutral | 0 |
| 2012-13 | The Independent | Broadsheet | Neutral | 1 |
| 2013-14 | The Independent | Broadsheet | Neutral | 1 |
| 2014-15 | The Independent | Broadsheet | Neutral | 2 |
| 2015-16 | The Independent | Broadsheet | Neutral | 3 |
| 2016-17 | The Independent | Broadsheet | Neutral | 5 |
| 2017-18 | The Independent | Broadsheet | Neutral | 1 |
| 2018-19 | The Independent | Broadsheet | Neutral | 4 |
| 2019-20 | The Independent | Broadsheet | Neutral | 2 |
| 2010-11 | The Mirror | Tabloid | Neutral | 0 |
| 2011-12 | The Mirror | Tabloid | Neutral | 0 |
| 2012-13 | The Mirror | Tabloid | Neutral | 0 |
| 2013-14 | The Mirror | Tabloid | Neutral | 0 |
| 2014-15 | The Mirror | Tabloid | Neutral | 0 |
| 2015-16 | The Mirror | Tabloid | Neutral | 1 |
| 2016-17 | The Mirror | Tabloid | Neutral | 0 |
| 2017-18 | The Mirror | Tabloid | Neutral | 2 |
| 2018-19 | The Mirror | Tabloid | Neutral | 1 |
| 2019-20 | The Mirror | Tabloid | Neutral | 0 |
| 2010-11 | The Observer | Broadsheet | Neutral | 0 |
| 2011-12 | The Observer | Broadsheet | Neutral | 0 |
| 2012-13 | The Observer | Broadsheet | Neutral | 0 |
| 2013-14 | The Observer | Broadsheet | Neutral | 0 |
| 2014-15 | The Observer | Broadsheet | Neutral | 0 |
| 2015-16 | The Observer | Broadsheet | Neutral | 0 |
| 2016-17 | The Observer | Broadsheet | Neutral | 0 |
| 2017-18 | The Observer | Broadsheet | Neutral | 0 |
| 2018-19 | The Observer | Broadsheet | Neutral | 1 |
| 2019-20 | The Observer | Broadsheet | Neutral | 0 |
| 2010-11 | The Sun | Tabloid | Neutral | 1 |
| 2011-12 | The Sun | Tabloid | Neutral | 1 |
| 2012-13 | The Sun | Tabloid | Neutral | 1 |
| 2013-14 | The Sun | Tabloid | Neutral | 0 |
| 2014-15 | The Sun | Tabloid | Neutral | 0 |
| 2015-16 | The Sun | Tabloid | Neutral | 3 |
| 2016-17 | The Sun | Tabloid | Neutral | 1 |
| 2017-18 | The Sun | Tabloid | Neutral | 2 |
| 2018-19 | The Sun | Tabloid | Neutral | 5 |
| 2019-20 | The Sun | Tabloid | Neutral | 0 |
| 2010-11 | The Sunday Times | Broadsheet | Neutral | 0 |
| 2011-12 | The Sunday Times | Broadsheet | Neutral | 0 |
| 2012-13 | The Sunday Times | Broadsheet | Neutral | 0 |
| 2013-14 | The Sunday Times | Broadsheet | Neutral | 0 |
| 2014-15 | The Sunday Times | Broadsheet | Neutral | 0 |
| 2015-16 | The Sunday Times | Broadsheet | Neutral | 0 |
| 2016-17 | The Sunday Times | Broadsheet | Neutral | 0 |
| 2017-18 | The Sunday Times | Broadsheet | Neutral | 0 |
| 2018-19 | The Sunday Times | Broadsheet | Neutral | 0 |
| 2019-20 | The Sunday Times | Broadsheet | Neutral | 1 |
| 2010-11 | The Times | Broadsheet | Neutral | 0 |
| 2011-12 | The Times | Broadsheet | Neutral | 0 |
| 2012-13 | The Times | Broadsheet | Neutral | 0 |
| 2013-14 | The Times | Broadsheet | Neutral | 2 |
| 2014-15 | The Times | Broadsheet | Neutral | 0 |
| 2015-16 | The Times | Broadsheet | Neutral | 3 |
| 2016-17 | The Times | Broadsheet | Neutral | 3 |
| 2017-18 | The Times | Broadsheet | Neutral | 1 |
| 2018-19 | The Times | Broadsheet | Neutral | 5 |
| 2019-20 | The Times | Broadsheet | Neutral | 2 |
| 2010-11 | Daily Star Online | Tabloid | Pro | 0 |
| 2011-12 | Daily Star Online | Tabloid | Pro | 0 |
| 2012-13 | Daily Star Online | Tabloid | Pro | 0 |
| 2013-14 | Daily Star Online | Tabloid | Pro | 0 |
| 2014-15 | Daily Star Online | Tabloid | Pro | 0 |
| 2015-16 | Daily Star Online | Tabloid | Pro | 1 |
| 2016-17 | Daily Star Online | Tabloid | Pro | 0 |
| 2017-18 | Daily Star Online | Tabloid | Pro | 0 |
| 2018-19 | Daily Star Online | Tabloid | Pro | 0 |
| 2019-20 | Daily Star Online | Tabloid | Pro | 0 |
| 2010-11 | The Sunday Express | Tabloid | Pro | 0 |
| 2011-12 | The Sunday Express | Tabloid | Pro | 0 |
| 2012-13 | The Sunday Express | Tabloid | Pro | 0 |
| 2013-14 | The Sunday Express | Tabloid | Pro | 0 |
| 2014-15 | The Sunday Express | Tabloid | Pro | 0 |
| 2015-16 | The Sunday Express | Tabloid | Pro | 0 |
| 2016-17 | The Sunday Express | Tabloid | Pro | 0 |
| 2017-18 | The Sunday Express | Tabloid | Pro | 0 |
| 2018-19 | The Sunday Express | Tabloid | Pro | 0 |
| 2019-20 | The Sunday Express | Tabloid | Pro | 0 |
| 2010-11 | telegraph.co.uk | Broadsheet | Pro | 0 |
| 2011-12 | telegraph.co.uk | Broadsheet | Pro | 0 |
| 2012-13 | telegraph.co.uk | Broadsheet | Pro | 0 |
| 2013-14 | telegraph.co.uk | Broadsheet | Pro | 0 |
| 2014-15 | telegraph.co.uk | Broadsheet | Pro | 0 |
| 2015-16 | telegraph.co.uk | Broadsheet | Pro | 0 |
| 2016-17 | telegraph.co.uk | Broadsheet | Pro | 1 |
| 2017-18 | telegraph.co.uk | Broadsheet | Pro | 0 |
| 2018-19 | telegraph.co.uk | Broadsheet | Pro | 0 |
| 2019-20 | telegraph.co.uk | Broadsheet | Pro | 0 |
| 2010-11 | The Daily Mail and Mail on Sunday | Tabloid | Pro | 0 |
| 2011-12 | The Daily Mail and Mail on Sunday | Tabloid | Pro | 0 |
| 2012-13 | The Daily Mail and Mail on Sunday | Tabloid | Pro | 0 |
| 2013-14 | The Daily Mail and Mail on Sunday | Tabloid | Pro | 0 |
| 2014-15 | The Daily Mail and Mail on Sunday | Tabloid | Pro | 0 |
| 2015-16 | The Daily Mail and Mail on Sunday | Tabloid | Pro | 0 |
| 2016-17 | The Daily Mail and Mail on Sunday | Tabloid | Pro | 0 |
| 2017-18 | The Daily Mail and Mail on Sunday | Tabloid | Pro | 0 |
| 2018-19 | The Daily Mail and Mail on Sunday | Tabloid | Pro | 0 |
| 2019-20 | The Daily Mail and Mail on Sunday | Tabloid | Pro | 0 |
| 2010-11 | The Express | Tabloid | Pro | 0 |
| 2011-12 | The Express | Tabloid | Pro | 0 |
| 2012-13 | The Express | Tabloid | Pro | 0 |
| 2013-14 | The Express | Tabloid | Pro | 0 |
| 2014-15 | The Express | Tabloid | Pro | 0 |
| 2015-16 | The Express | Tabloid | Pro | 0 |
| 2016-17 | The Express | Tabloid | Pro | 0 |
| 2017-18 | The Express | Tabloid | Pro | 0 |
| 2018-19 | The Express | Tabloid | Pro | 0 |
| 2019-20 | The Express | Tabloid | Pro | 0 |
| 2010-11 | The Guardian | Broadsheet | Pro | 0 |
| 2011-12 | The Guardian | Broadsheet | Pro | 0 |
| 2012-13 | The Guardian | Broadsheet | Pro | 0 |
| 2013-14 | The Guardian | Broadsheet | Pro | 0 |
| 2014-15 | The Guardian | Broadsheet | Pro | 0 |
| 2015-16 | The Guardian | Broadsheet | Pro | 1 |
| 2016-17 | The Guardian | Broadsheet | Pro | 0 |
| 2017-18 | The Guardian | Broadsheet | Pro | 0 |
| 2018-19 | The Guardian | Broadsheet | Pro | 0 |
| 2019-20 | The Guardian | Broadsheet | Pro | 0 |
| 2010-11 | The Independent | Broadsheet | Pro | 0 |
| 2011-12 | The Independent | Broadsheet | Pro | 0 |
| 2012-13 | The Independent | Broadsheet | Pro | 0 |
| 2013-14 | The Independent | Broadsheet | Pro | 0 |
| 2014-15 | The Independent | Broadsheet | Pro | 1 |
| 2015-16 | The Independent | Broadsheet | Pro | 1 |
| 2016-17 | The Independent | Broadsheet | Pro | 0 |
| 2017-18 | The Independent | Broadsheet | Pro | 0 |
| 2018-19 | The Independent | Broadsheet | Pro | 0 |
| 2019-20 | The Independent | Broadsheet | Pro | 0 |
| 2010-11 | The Mirror | Tabloid | Pro | 0 |
| 2011-12 | The Mirror | Tabloid | Pro | 0 |
| 2012-13 | The Mirror | Tabloid | Pro | 0 |
| 2013-14 | The Mirror | Tabloid | Pro | 0 |
| 2014-15 | The Mirror | Tabloid | Pro | 0 |
| 2015-16 | The Mirror | Tabloid | Pro | 0 |
| 2016-17 | The Mirror | Tabloid | Pro | 0 |
| 2017-18 | The Mirror | Tabloid | Pro | 0 |
| 2018-19 | The Mirror | Tabloid | Pro | 0 |
| 2019-20 | The Mirror | Tabloid | Pro | 0 |
| 2010-11 | The Observer | Broadsheet | Pro | 0 |
| 2011-12 | The Observer | Broadsheet | Pro | 0 |
| 2012-13 | The Observer | Broadsheet | Pro | 0 |
| 2013-14 | The Observer | Broadsheet | Pro | 0 |
| 2014-15 | The Observer | Broadsheet | Pro | 0 |
| 2015-16 | The Observer | Broadsheet | Pro | 0 |
| 2016-17 | The Observer | Broadsheet | Pro | 0 |
| 2017-18 | The Observer | Broadsheet | Pro | 0 |
| 2018-19 | The Observer | Broadsheet | Pro | 0 |
| 2019-20 | The Observer | Broadsheet | Pro | 0 |
| 2010-11 | The Sun | Tabloid | Pro | 0 |
| 2011-12 | The Sun | Tabloid | Pro | 0 |
| 2012-13 | The Sun | Tabloid | Pro | 0 |
| 2013-14 | The Sun | Tabloid | Pro | 0 |
| 2014-15 | The Sun | Tabloid | Pro | 0 |
| 2015-16 | The Sun | Tabloid | Pro | 0 |
| 2016-17 | The Sun | Tabloid | Pro | 0 |
| 2017-18 | The Sun | Tabloid | Pro | 0 |
| 2018-19 | The Sun | Tabloid | Pro | 0 |
| 2019-20 | The Sun | Tabloid | Pro | 0 |
| 2010-11 | The Sunday Times | Broadsheet | Pro | 0 |
| 2011-12 | The Sunday Times | Broadsheet | Pro | 0 |
| 2012-13 | The Sunday Times | Broadsheet | Pro | 0 |
| 2013-14 | The Sunday Times | Broadsheet | Pro | 0 |
| 2014-15 | The Sunday Times | Broadsheet | Pro | 0 |
| 2015-16 | The Sunday Times | Broadsheet | Pro | 0 |
| 2016-17 | The Sunday Times | Broadsheet | Pro | 0 |
| 2017-18 | The Sunday Times | Broadsheet | Pro | 0 |
| 2018-19 | The Sunday Times | Broadsheet | Pro | 0 |
| 2019-20 | The Sunday Times | Broadsheet | Pro | 0 |
| 2010-11 | The Times | Broadsheet | Pro | 1 |
| 2011-12 | The Times | Broadsheet | Pro | 0 |
| 2012-13 | The Times | Broadsheet | Pro | 0 |
| 2013-14 | The Times | Broadsheet | Pro | 0 |
| 2014-15 | The Times | Broadsheet | Pro | 0 |
| 2015-16 | The Times | Broadsheet | Pro | 0 |
| 2016-17 | The Times | Broadsheet | Pro | 1 |
| 2017-18 | The Times | Broadsheet | Pro | 0 |
| 2018-19 | The Times | Broadsheet | Pro | 1 |
| 2019-20 | The Times | Broadsheet | Pro | 4 |
